# Supplementary material for: Enasidenib as maintenance following allogeneic hematopoietic cell transplantation for IDH2-mutated myeloid malignancies
Source: PubMed Central journal article supplement — Blood Adv. 2022 Sep 27;6(22):5857–65. doi: 10.1182/bloodadvances.2022008632 (PMC9649991; doi:10.1182/bloodadvances.2022008632), 2022-09-27
Supplement: BLOODA_ADV-2022-008632-mmc1.pdf [file BLOODA_ADV-2022-008632-mmc1.pdf]

Supplemental Figure 1.

A.

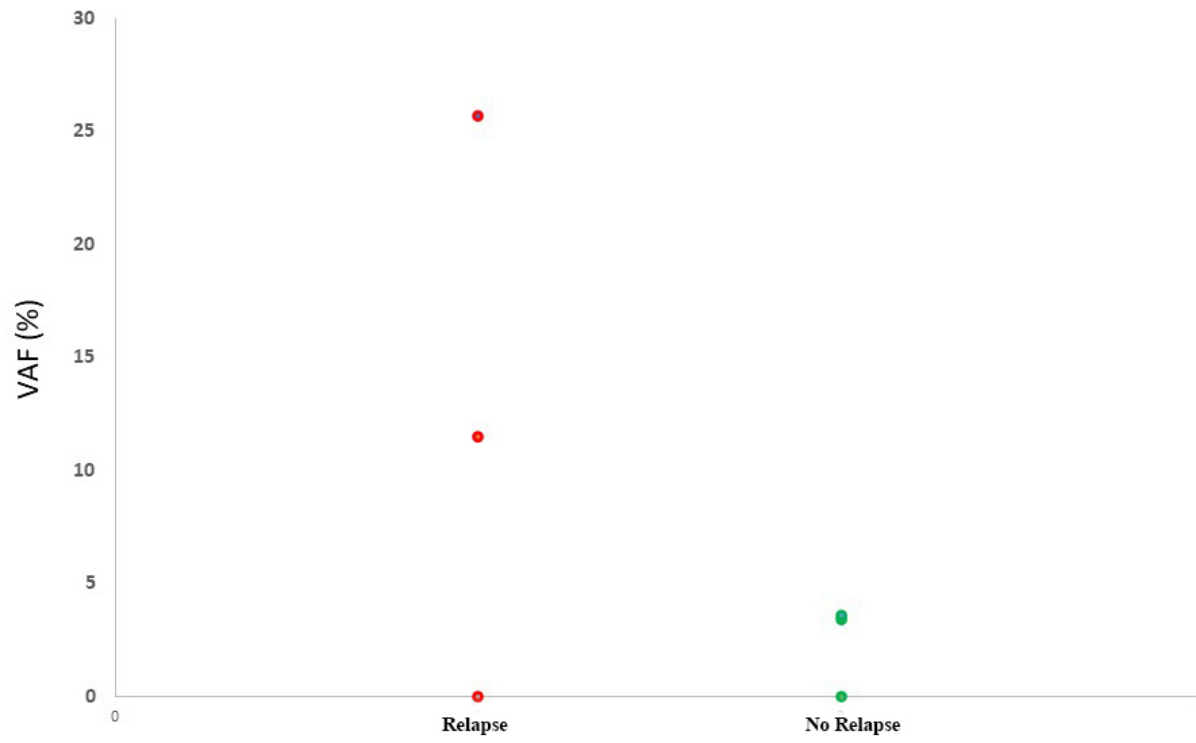

(A) *IDH2* Mutational Burden among those with (N=3) or without (N=6) subsequent relapse.

**B.**

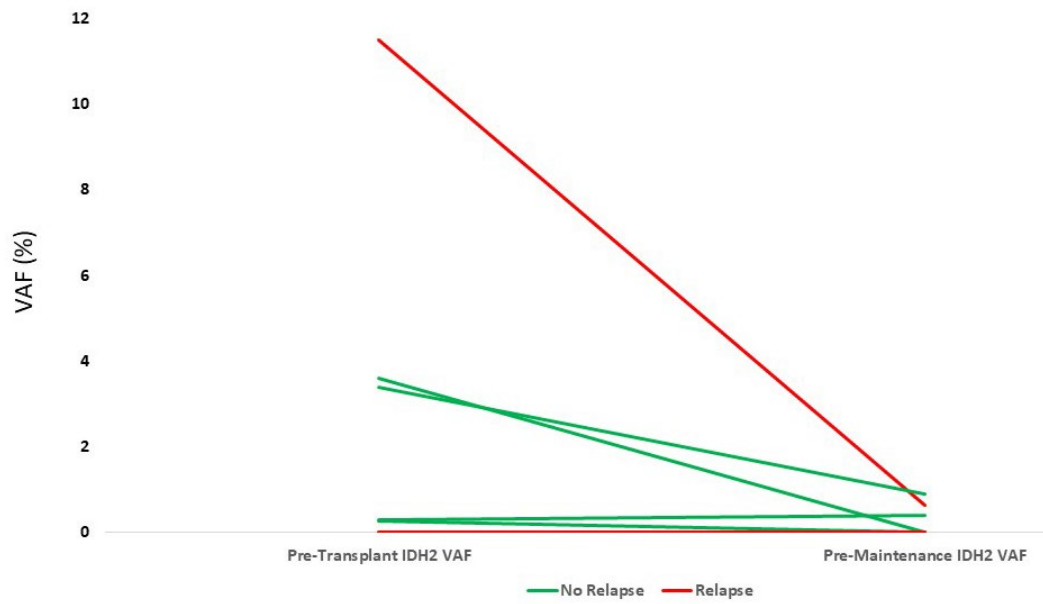

(B) Change in *IDH2* Mutational Burden from pre-transplant to time of maintenance initiation and subsequent relapse for patients with both data points available (N=8). VAF: Variant allelic fraction.

**Supplemental Figure 2.**

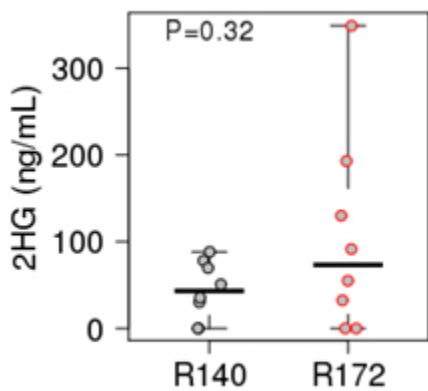

There was no significant difference between baseline plasma 2-HG and subsequent relapse for patients with patients with R140 versus R172 *IDH2* mutations.

## Supplemental Table

| Patient # | Pre-HCT Marrow IDH2 VAF (%) | Pre-HCT Marrow Blasts (%) | Pre-Treatment Marrow IDH2 VAF (%) | Pre-Treatment Marrow Blasts (%) |
|-----------|-----------------------------|---------------------------|-----------------------------------|---------------------------------|
| 2         | 25.7                        | 0.5                       |                                   |                                 |
| 3         |                             |                           | 0.135                             | 1.0                             |
| 4         |                             |                           | 0.092                             | 0                               |
| 5         | 0.282                       | 1.0                       | 0.392                             | 4.0                             |
| 6         | 11.5                        | 2.0                       | 0.631                             | 1.0                             |
| 7         |                             |                           | 0                                 | 1.6                             |
| 8         |                             |                           | 0                                 | 0.5                             |
| 9         | 0                           | 1.0                       | 0                                 | 3.0                             |
| 10        | 0.267                       | 3.0                       | 0                                 | 2.0                             |
| 14        |                             |                           | 0                                 | 0                               |
| 15        | 3.4                         | 3.0                       | 0.9                               | 1.0                             |
| 17        | 0                           | 0                         | 0                                 | 2.0                             |
| 18        | 3.6                         | 3.0                       | 0                                 | 0                               |
| 20        | 0                           | 1.0                       | 0                                 | 1.0                             |
| 21        |                             |                           | 7.01                              | 0                               |
